# Supplementary material
Source: Springer Nature journal article supplement (https://www.springerprofessional.de/resource/supplementary/13173_2013_1_MOESM2_ESM.pdf/11897006)
Supplement: MOESM2 [file 11897006]

# Self-Adaptive Software System

**Controller**

Adapt

**Effectors**

**Target System**

**Probes**

Monitor

Affect

**Environment**

Non-controllable software, hardware,  
network, physical context

Monitor

**Probes**

Monitor
